# Supplementary material
Source: Research Square preprint supplement (doi:10.21203/rs.3.rs-9238113/v1)
Supplement: Supplementary file 2 [file 3d2ad2033d6c8100ca74ae88.docx]

# Supplementary Material

For “Uzatresgene autoleucel autologous T-cell monotherapy for advanced solid tumors: SURPASS, a phase 1, open-label trial”

Victor Moreno, Kathleen Moore, Adam Asch, Brian A. Van Tine, John Charlson, Marcus O. Butler, Andres Cervantes, Jeffrey M. Clarke, Jon Zugazagoitia, Emiliano Calvo, Donald Lawrence, David H. Aggen, Elena Garralda, Ana Oaknin, Melissa Johnson, Bernard Doger, Angelina Petrichenko, Emma J. Cook, Aoife M. Roche, Frederic D. Bushman,Francine Brophy, Alejandro Garcia-Consuegra, Amy Sauer, Marisa Rosenberg, Darren Jolliffe, Laura Boxall, Chris Evans, Alex Tipping, Martin Isabelle, Robyn Broad, Bhavna Paratala, Molly McNickle, Elliot Norry, Karen Chagin & David S. Hong

**Protocol Inclusion Criteria**

1. Subject (or legally authorized representative) has voluntarily agreed to participate by giving written Informed Consent in accordance with International Council for Harmonization Good Clinical Practice (ICH GCP) guidelines and applicable local regulations.

2. Subject has agreed to abide by all protocol-required procedures including study-related assessments, and management by the treating institution for the duration of the study including LTFU.

3. Age ≥18 and ≤75 years at the time the Informed Consent is signed.

4. Histologically or cytogenetically confirmed diagnosis of any one of the following cancers:

(A) urothelial cancer, (B) esophageal, (C) esophagogastric junction (EGJ) cancer, (D) gastric cancer, (E) non-small cell lung carcinoma (NSCLC), (F) head and neck (H&N) carcinoma, or (G) ovarian carcinoma, (H) melanoma, or (I) endometrial carcinoma.

5. Measurable disease according to RECIST v1.1 prior to lymphodepletion.

6. Subject must receive ADP-A2M4CD8 as the next therapy following leukapheresis. Subjects may receive bridging therapy after leukapheresis, while awaiting manufacturing of ADP-A2M4CD8, but must adhere to the mandatory washout periods (Section 5.3) Bridging therapy may be a continuation of the therapy the subject was receiving prior to leukapheresis or may be a new therapy. For the H&N and Urothelial dedicated cohorts, subjects may receive standard of care while awaiting the manufacturing of ADP-A2M4CD8.

7. Subject has the following disease-specific requirements for their tumor type. NOTE: Adjuvant, neoadjuvant, or bridging therapy is not considered a prior line of systemic therapy.

*Urothelial Carcinoma*

• Histologically or cytologically confirmed urothelial carcinoma (including mixed histologies of urothelial carcinoma with elements of other subtypes) of the renal pelvis, ureter, bladder, or urethra with metastatic or unresectable locally advanced disease.

• Prior therapy requirements (monotherapy or in combination with nivolumab):

• Subjects must have received or refused 1 prior platinum-based therapy for the treatment of metastatic or locally advanced unresectable disease.

• Subjects who are not eligible for a platinum-containing regimen or who have progressed on a platinum-containing regimen may have received an anti–PD-l/PD-L1 checkpoint inhibitor.

• Subjects must have received no more than three prior systemic regimens, unless discussed and agreed upon with the sponsor. Prior systemic regimens may include investigational therapies.

*Esophageal, Esophagogastric Junction (EGJ), or Gastric Carcinoma*

• Histologically or cytologically confirmed esophageal (squamous or adenocarcinoma), EGJ, or gastric carcinoma with metastatic or unresectable locally advanced disease.

• Prior therapy requirements:

• Subjects must have received or refused a fluoropyrimidine (fluorouracil or capecitabine) and/or platinum regimen.

• Subjects whose tumors are known to be HER2 positive must have failed (progressive disease or unacceptable toxicity) or refused trastuzumab.

• May have received ramucirumab.

• Subjects must have received no more than three prior systemic regimens, unless discussed and agreed upon with the sponsor. Prior systemic regimens may include investigational therapies.

*NSCLC*

• Histologically or cytologically confirmed advanced NSCLC (squamous cell, adenocarcinoma, adenosquamous, or large cell carcinoma) with metastatic or unresectable locally advanced disease.

• Prior therapy requirements:

• Subjects whose tumor is known to have EGFR mutations or *ALK* gene rearrangements must have received or refused a prior EGFR or ALK inhibitor, respectively.

• Subjects whose tumor is known to have a ROS1 rearrangement or BRAF V600E mutation must have received or refused a ROS1 or BRAF inhibitor, respectively.

• Subjects must have received or refused anti–PD-1/PD-L1 monotherapy or combination therapy with chemotherapy.

• Subjects who have not received an anti–PD-1/PD-L1 therapy as first-line therapy for metastatic disease, must have received or refused anti–PD-1/PD-L1 therapy as second-line therapy.

• Subjects must have received no more than three prior systemic regimens, unless discussed and agreed upon with the sponsor. Prior systemic regimens may include investigational therapies.

• Targeted therapies for EGFR/BRAF V600E mutations or ALK/ROS1 rearrangements are not considered part of these three systemic regimens.

*Head and Neck Carcinoma*

• Histologically or cytologically confirmed head and neck carcinoma (squamous cell, adenocarcinoma, or undifferentiated carcinoma) with metastatic or unresectable locally advanced disease.

• Prior therapy requirements (monotherapy or combination with nivolumab):

• Subjects must have received or refused a platinum-containing chemotherapy regimen for treatment of primary tumor in adjuvant, locally advanced, or metastatic settings.

• Subjects must have received or refused an anti–PD-1/PD-L1 as monotherapy or in combination with chemotherapy.

• Subjects must have received no more than three prior systemic regimens, unless discussed and agreed upon with the sponsor. Prior systemic regimens may include investigational therapies.

*Ovarian Carcinoma*

• Histologically or cytologically confirmed ovarian carcinoma (including epithelial ovarian, primary peritoneal, or fallopian tube carcinoma) with disease recurrence or disease progression

• Prior therapy requirements:

• The first-line therapy must have been a platinum-based chemotherapy regimen for primary disease, possibly including intra-peritoneal therapy, consolidation, or extended therapy (maintenance/consolidation) administered after surgical or non-surgical assessment.

• Subjects may have received no more than three prior systemic therapies, unless discussed and agreed upon with the sponsor. Prior systemic therapies may include investigational therapies.

• Subjects must have progressed ≤12 months after completion of their last platinum-based chemotherapy or have documented platinum intolerance. The number of months (platinum-free interval) should be calculated from the date of the last administered dose of platinum therapy to the date of documentation of progression.

• Subjects should have received or refused a PARP inhibitor for BRCA mutant ovarian cancer if indicated.

*Melanoma*

• Histologically or cytologically confirmed melanoma with metastatic or unresectable locally advanced disease.

• Prior therapy requirements:

• Subjects must have received or refused a BRAF inhibitor as monotherapy or in combination with other targeted agents for BRAF V600E mutant melanoma.

• Subjects must have received or refused an anti–PD-1/PD-L1 inhibitor as monotherapy or combination with anti–CTLA-4 inhibitor or other therapies.

• Subjects must have received no more than three prior systemic regimens, unless discussed and agreed upon with the sponsor. Prior systemic therapies may include investigational therapies.

• Targeted therapies with a BRAF inhibitor alone or in combination with other targeted agents are not considered part of these three systemic regimens.

*Endometrial Carcinoma*

• Recurrent or metastatic histologically or cytologically confirmed endometrial cancer, excluding sarcoma of the corpus uteri.

• Prior therapy requirements:

• Must have previously received or refused platinum- and anti–PD-1/PD-L1–containing regimen. Chemotherapy administered concomitantly with primary radiotherapy as a radiosensitizer would not be counted.

• Subjects must have received no more than three prior systemic regimens, unless discussed and agreed upon with the sponsor. Prior systemic therapies may include investigational therapies.

8. Subject is positive for HLA-A*02:01, HLA-A*02:02, HLA-A*02:03, or HLA-A*02:06 allele via Adaptimmune-designated central laboratory testing (this determination will be made under screening protocol ADP-0000-001). HLA-A*02 alleles having the same protein sequence in the peptide binding domains (P group) will also be included. Other HLA-A*02 alleles may be eligible after adjudication with the Sponsor. The Sponsor will review the results of HLA typing for inclusion alleles and will adjudicate subject eligibility based on HLA results.

9. Tumor (either an archival specimen or a fresh biopsy) shows MAGE-A4 expression defined as ≥30% of tumor cells that are ≥2+ by immunohistochemistry (IHC). All samples must have been pathologically reviewed by an Adaptimmune-designated central laboratory confirming expression.

10. Subject has an Eastern Cooperative Oncology Group (ECOG) Performance Status of 0 or 1.

11. Left ventricular ejection fraction (LVEF) ≥50% or the institutional lower limit of normal range, whichever is lower.

12. Fit for leukapheresis and adequate venous access can be established for the cell collection.

13. Female subject of childbearing potential (FCBP) must have a negative urine or serum pregnancy test AND must agree to use an effective method of contraception per section 10.5.1 and must also agree to refrain from egg donation, storage, or banking during these same time periods.

OR –

Male subjects must be surgically sterile or agree to use a double barrier contraception method or abstain from heterosexual activity with a FCBP per section 10.5.1. Male subjects must also agree to refrain from sperm donation, storage, or banking during these same time periods.

14. Subject has adequate organ function.

15. Subjects must have ≥ 90% room air oxygen saturation at rest at Screening (within 7 days of leukapheresis) and at baseline.

16. Subjects should submit a baseline tumor biopsy, with the exception of subjects for whom there is no safely accessible tumor tissue. A baseline biopsy collected prior to baseline may be acceptable after discussion with the sponsor.

**Protocol Exclusion Criteria**

1. Subject is positive for HLA-A*05 in either allele via Adaptimmune-designated central laboratory testing. HLA-A*02 alleles having the same protein sequence as HLA-A*02:05 in the peptide binding domains (P groups) will also be excluded. Other alleles may be exclusionary after adjudication with the sponsor.

2. Subject has received or plans to receive the following therapy/treatment prior to leukapheresis or lymphodepleting chemotherapy: Cytotoxic chemotherapy; antibody-drug conjugates; small molecules/tyrosine kinase inhibitors such as dabrafenib, trametinib, vemurafaneb, and cobimetinib; anti–PD-1/anti–PD-L1; biologics, including other immunotherapies (i.e., monoclonal antibodies and bispecifics); experimental anticancer vaccine; gene therapy using an integrating vector; corticosteroids or any other immunosuppressive therapy; anti–MAGE-A4 therapy; investigational treatment; allogeneic hematopoietic stem cell transplant; radiotherapy that involves the lung (V20 exceeding 30% lung volume) or pericardium (>20 Gy); radiation to vital organs (e.g., liver, kidney); radiation to the pelvis; whole brain radiotherapy or brain stereotactic radiosurgery; palliative radiotherapy to the non-target lesions.

3. Toxicity from previous anticancer therapy must have recovered to ≤ Grade 1 or baseline prior to enrollment (except for non-clinically significant toxicities, e.g., alopecia, vitiligo). Subjects with Grade 2 toxicities that are deemed stable or irreversible (e.g., peripheral neuropathy) can be enrolled.

4. History of allergic reactions attributed to compounds of similar chemical or biologic composition to fludarabine, cyclophosphamide, anti–PD-1, anti–PD-L1 or other agents used in the study.

5. Subject has a history of chronic or recurrent (within the last year prior to screening) severe autoimmune or immune-mediated disease requiring steroids or other immunosuppressive treatments, including anti–tumor necrosis factor (TNF) agents. Subjects with hypothyroidism, Type I diabetes, adrenal insufficiency, or pituitary insufficiency that are stable on replacement therapy are eligible. Subjects with disorders such as asthma, vitiligo psoriasis or atopic dermatitis that are well controlled without requiring systemic immunosuppression are also eligible. For other stable immune conditions which do not require prednisone or their equivalent for other corticosteroid agents may be acceptable after the discussion with the Sponsor.

6. Subject had major surgery within 4 weeks prior to lymphodepletion; subjects should have been fully recovered from any surgical related toxicities.

7. Leptomeningeal disease, carcinomatous meningitis, or symptomatic CNS metastases. Subjects with a prior history of symptomatic CNS metastases must have received treatment (i.e., stereotactic radiosurgery [SRS], whole brain radiation [WBRT] or surgery) and be neurologically stable for at least 1 month, not requiring anti-seizure medications and off steroids for at least 14 days prior to leukapheresis and lymphodepletion. Subjects who have asymptomatic CNS metastases without associated edema, shift, requirement for steroids or anti-seizure medications are eligible. If such a subject receives SRS or WBRT, a minimum period of 2 weeks needs to lapse between the therapy and lymphodepletion. Prophylactic anti-seizure medication is allowed.

8. Other prior malignancy that is not considered by the Investigator to be in complete remission. Resectable squamous or basal cell carcinoma of the skin is acceptable.

9. Clinically significant cardiovascular disease including, but not limited to any of the following:

• Electrocardiogram (ECG) showing clinically significant abnormality.

• Uncontrolled clinically significant arrhythmias.

• Known family history or congenital history of prolonged QT syndrome or history of Torsade de Pointes.

• Uncontrolled hypertension despite optimal medical therapy.

• Acute Coronary Syndrome (angina or MI) in the last 6 months.

• Clinically significant cardiac disease defined by congestive heart failure New York Heart Association Class 3 and 4.

• History of stroke or central nervous system bleeding; transient ischemic attack or reversible ischemic neurologic deficit within last 6 months.

• Cardiac or pericardial tumor involvement.

10. Uncontrolled intercurrent illness including, but not limited to any of the following:

• Ongoing or active systemic infection, or localized infection which may become systemic due to leukapheresis procedure, e.g., catheter insertion will be excluded. For COVID-19 infection see Protocol Section 10.4.4.1.

• Clinically significant pulmonary disease with any 1 pulmonary function parameter < 60% predicted (forced expiratory volume first forced breath [FEV1], total lung capacity [TLC], or diffusing capacity of lungs for carbon monoxide [DLCO]) assessed prior to leukapheresis and within 2 months of the start of lymphodepleting chemotherapy. Note: For patients with anemia, corrected DLCO could be used.

• Bilateral lung high tumor burden for nodal lesions (sum of the diameters >100 mm).

• Requirement for oxygen support (for cardiac or pulmonary disease).

• Interstitial lung disease (pneumonitis), history of pneumonectomy, or of COPD with ≥ one exacerbation within 1 year prior to the Screening visit that required treatment with systemic corticosteroids or resulted in hospitalization.

• Hospitalization for bowel obstruction in last 2 months.

• Hematosis or significant organ bleeding in last 2 months.

• Ascites or pleural effusion which requires repeated (2 within 4 weeks) paracentesis or thoracentesis within last 2 months.

• Pre-existing active skin disorders of Grade 2 or greater severity.

11. Active infection with human immunodeficiency virus (HIV), hepatitis B virus, hepatitis C virus (HCV), or human T-cell leukemia virus (HTLV) as defined below:

• Positive serology for HIV.

• Active hepatitis B infection as demonstrated by test for hepatitis B surface antigen. Subjects who are hepatitis B surface antigen negative but are hepatitis B core antibody positive must have undetectable hepatitis B DNA and receive prophylaxis against viral reactivation. Prophylaxis should be initiated prior to lymphodepleting therapy and continued for 6 months.

• Active hepatitis C infection as demonstrated by hepatitis C ribonucleic acid (RNA) test. Subjects who are HCV antibody positive will be screened for HCV RNA by any RT PCR or branched DNA (bDNA) assay. If HCV antibody is positive, eligibility will be determined based on a negative screening RNA value.

• Positive serology for HTLV 1 or 2.

• Re-screening for infectious disease markers is not required at baseline (prior to lymphodepletion) unless > 6 months has elapsed.

12. Subject is pregnant or breastfeeding.

13. In the opinion of the Investigator, the subject will be unlikely to fully comply with protocol requirements.

**Supplementary Methods**

**Dose-limiting toxicities**

In evaluating potential DLTs, there may be a toxicity considered clearly attributable to the disease, lymphodepleting chemotherapy regimen, or otherwise clearly unrelated to the T-cell product. For these events, the safety review committee assessed whether the toxicity was deemed a DLT. In specific instances, such as prolonged cytopenias, a grade ≥ 3 toxicity occurring beyond 30 days was considered an AE of special interest and may be considered a DLT. During the DLT period, the following toxicities were not considered DLTs: grade 3 fever, grade 3 febrile neutropenia resolving to ≤ grade 2 in 7 days, grade 3 colitis resolving to grade ≤ 2 within 7 days, grade 3 CRS or toxicities related to CRS resolving to grade ≤ 2 within 7 days, grade 4 CRS or toxicities related to CRS resolving to grade ≤ 3 within 2 days and to grade ≤ 2 within 5 additional days, grade 3 rash associated with CRS or drug reaction, grade 3 diarrhea, nausea, or vomiting resolving to grade ≤ 2 with supportive treatment within 3 days after onset, grade 3 abnormal electrolytes resolving to grade ≤ 2 with supportive treatment within 7 days, grade 4 abnormal electrolytes resolving to grade ≤ 3 within 2 days and to grade ≤ 2 within 5 additional days with supportive treatment, grade 3 hypoalbuminemia, grade 3 alanine aminotransferase (ALT) and/or aspartate aminotransferase (AST) elevation resolving to grade ≤ 2 or baseline within 7 days, grade 3 anemia, grade 3 or 4 leukopenia, lymphopenia or neutropenia, grade 3 or 4 thrombocytopenia not associated with significant bleeding, grade 3 generalized weakness, fatigue, anorexia, or insomnia resolving to grade ≤ 2 within 7 days.

## Statistical analyses

Best overall response, time to response, duration of response, progression-free survival, and OS were summarized descriptively, with time-to-event endpoints analyzed using Kaplan-Meier methodology to estimate the median, and the 25th and 75th percentiles. Time to response was defined as the duration between the date of T-cell infusion and the initial date of the confirmed response. Duration of response was defined as the duration from the initial date of the confirmed response to the date of progressive disease based on RECIST v1.1 or death due to any cause. Progression-free survival was defined as the interval between the date of T-cell infusion and the earliest date of disease progression based on RECIST v1.1 or death due to any cause. OS was defined as the duration between T-cell infusion and death due to any cause. Statistical analyses of translational data were performed as described in the respective figure legends.

## Integration site analysis

Integration site analysis was carried out using ligation-mediated PCR as described.17,18 Clonal abundance was quantified using the SonicAbundance method, in which different length DNA fragments in the sequence data are used to infer isolation of DNAs from independent cells.19 All integration site sequence data is deposited at the NCBI SRA under bioproject PRJNA1259965.

## Tumor biopsy sections

Baseline and post-infusion biopsy sections from the target tumor lesions of participants were processed for single-plex immunohistochemistry (IHC) to visualize marker antigen presence using chromogenic antibody staining, duplex chromogenic IHC/in situ hybridization using RNAscope technology (Advanced Cell Diagnostics, Newark, CA) to achieve simultaneous visualization of targets’ protein and RNA expression, and multiplex immunofluorescence (mIF; Ultivue, Cambridge, MA, USA), which uses a panel of fluorescence antibody staining against a number of antigen markers.3 Stained slides were scanned using the AxioScan.Z1 microscope slide scanner and analyzed using HALO image analysis software (Indica Labs, Albuquerque, NM, USA). Immunophenotypic markers included in the panels were selected to phenotype T cells, exhaustion, activation, memory, proliferation, and checkpoint status with densities quantified using HALO analysis software.

## Flow cytometry

In vitro profiling of uza-cel phenotypic composition was performed via multiparameter flow cytometry. Manufactured products were thawed, washed, and counted using a Nexcelom Cellometer T4. One million viable cells were washed and stained with fixable viability dye (L34966, Invitrogen). These cells were washed and stained with a dextramer specific for the MAGE-A4 T-cell receptor, washed and stained with FcR block (130-059-901, Miltenyi Biotec) and optimal titres of CD3 AF700 (clone UCHT1), CD4 BUV395 (RPA-T4), CD8 BUV496 (RPA-T8), CD45RA (clone HI100), and CCR7 (clone 150503), among other markers. Cells were washed and acquired on an X20 Fortessa flow cytometer (BD Biosciences) using optimized application settings.

## Serum protein analysis

A Meso Scale Discovery platform and multiplex kits were used to determine levels of a panel of pharmacodynamic biomarkers; serum samples were collected at baseline, pre infusion, and 2–4 hours post infusion on day 1; days 2, 4, and 8; weeks 2, 4, 8, 12, and 24; and every 2 months post infusion. In general, baseline was defined as the last assessment prior to lymphodepletion.

## Data availability

The clinical datasets generated and analyzed during the current study are available upon reasonable request for research only, noncommercial purposes. Such datasets include the study protocol, statistical analysis plan, individual participant data that underlie the results reported in this Article after de-identification (text, tables, figures, and appendices), and supporting documentation, as required. Restrictions relating to patient confidentiality and consent will be maintained by aggregating and anonymizing identifiable patient data. The clinical data will be available beginning immediately after article publication and thereafter with no time limit. Requests should be sent in writing describing the nature of the proposed research and extent of data requirements. Data recipients are required to enter a formal data sharing agreement that describes the conditions for release and requirements for data transfer, storage, archiving, publication, and intellectual property. Requests should be directed to [medical.information@adaptimmune.com](mailto:medical.information@adaptimmune.com) and will be reviewed by the first and last authors, and by Adaptimmune. Responses will typically be provided within 60 days of the initial request.
